# Supplementary material for: Chemokine Receptors CCR1 and CCR2 on Peripheral Blood Mononuclear Cells of Newly Diagnosed Patients with the CD38-Positive Chronic Lymphocytic Leukemia
Source: MDPI journal article supplement (doi:10.3390/jcm9072312), 2020-07-21
Supplement: s1 [file s1]

# Supplementary Materials: Chemokine Receptors CCR1 and CCR2 on Peripheral Blood Mononuclear Cells of Newly Diagnosed Patients with the CD38-Positive Chronic Lymphocytic Leukemia

Irina Kholodnyuk, Alla Rivkina, Laura Hippe, Simons Svirskis, Svetlana Kozireva, Ildze Ventina, Irina Spaka, Marina Soloveichika, Jelena Pavlova, Modra Murovska and Sandra Lejniece

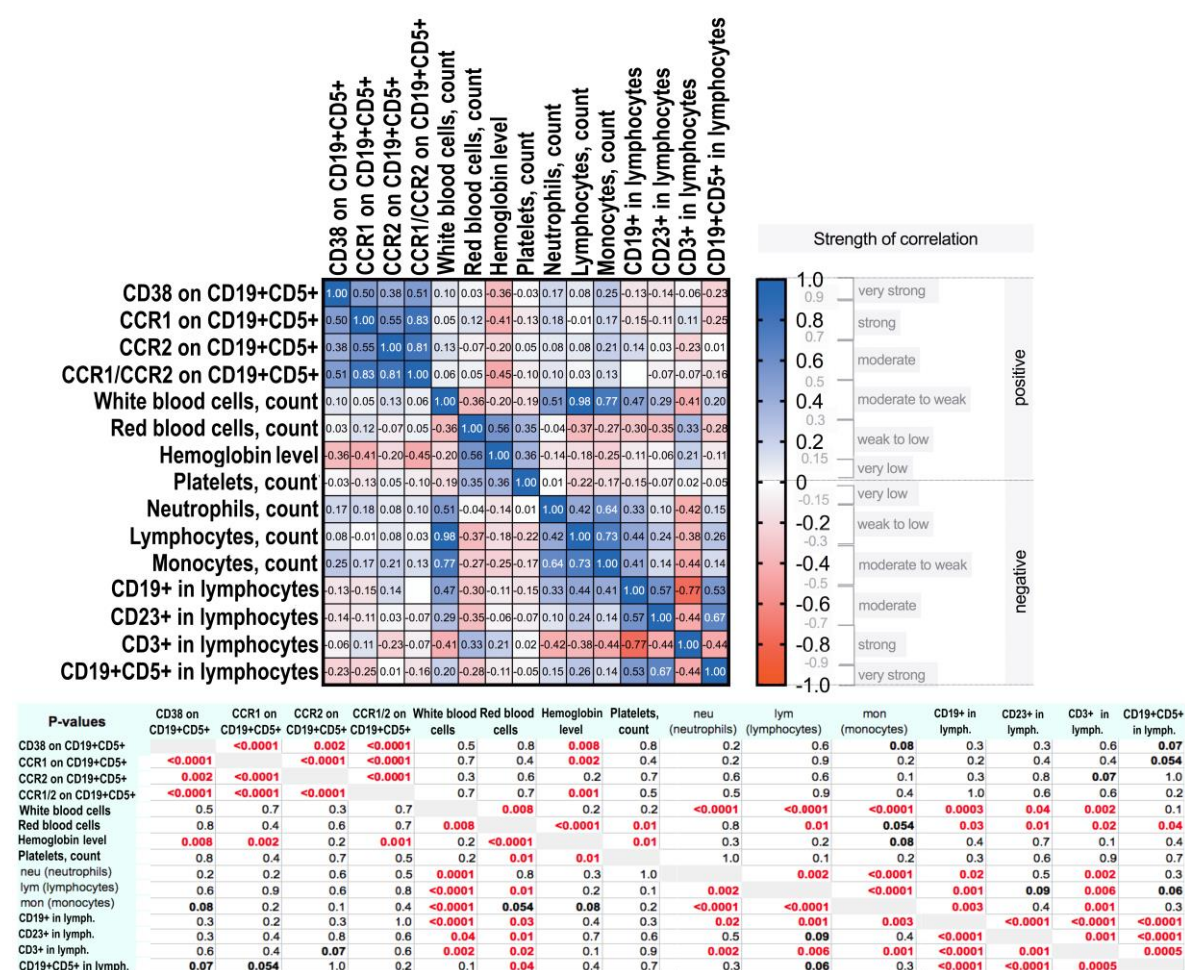

**Figure S1.** Spearman's rank correlation analysis of the clinical parameters and the frequencies of the CD38-, CCR1-, and CCR2-expressing peripheral blood (PB) CD19<sup>+</sup>CD5<sup>+</sup> lymphocytes in the newly diagnosed CLL patients. The Spearman's rank correlation analysis matrix is shown. CD38 on CD19<sup>+</sup>CD5<sup>+</sup>, the frequency of the CD38-expressing cells within the PB CD19<sup>+</sup>CD5<sup>+</sup> lymphocytes; CCR1 on CD19<sup>+</sup>CD5<sup>+</sup> and CCR2 on CD19<sup>+</sup>CD5<sup>+</sup>, the frequencies of the corresponding receptor-expressing cells within the PB CD19<sup>+</sup>CD5<sup>+</sup> lymphocytes; CCR1/CCR2 on CD19<sup>+</sup>CD5<sup>+</sup>, the frequency of the CCR1- or CCR2-expressing cells within the PB CD19<sup>+</sup>CD5<sup>+</sup> lymphocytes. The clinical parameters shown in Table 1 were analyzed. In the table, the corresponding *p*-values are presented. Note the *p*-values that are not exceeding the significance cut-off value of 0.05.
